# Supplementary material
Source: PubMed Central journal article supplement (PMC7993417)
Supplement: 41581_2021_411_MOESM1_ESM.pdf [file 41581_2021_411_MOESM1_ESM.pdf]

---

**Supplementary information**

---

**Phenotypic diversity and metabolic specialization of renal endothelial cells**

---

In the format provided by the authors and unedited

**Supplementary Table 1 | Renal endothelial cell marker genes and known functions**

| <b>Gene</b>    | <b>Protein</b>                                                                              | <b>Compartment</b>                                                                     | <b>Function</b>                                                                                                                                      | <b>Ref.</b> |
|----------------|---------------------------------------------------------------------------------------------|----------------------------------------------------------------------------------------|------------------------------------------------------------------------------------------------------------------------------------------------------|-------------|
| <i>Abcc4</i>   | ATP binding cassette subfamily C member 4 (Multidrug resistance-associated protein 4)       | Glomerular capillaries                                                                 | Organic anion transporter                                                                                                                            | 1,2         |
| <i>Ace</i>     | Angiotensin-converting enzyme                                                               | Large arteries                                                                         | Conversion of angiotensin I into angiotensin II; involved in vasotone regulation                                                                     | 3,4         |
| <i>Adipor2</i> | Adiponectin receptor 2                                                                      | DVR                                                                                    | Adiponectin receptor; involved in vasotone regulation                                                                                                | 5           |
| <i>Akr1b3</i>  | Aldo-keto reductase family 1 member B3                                                      | DVR papilla and AVR papilla                                                            | Reduction of glucose to sorbitol; maintenance of cell volume during hyperosmolarity                                                                  | 6           |
| <i>Aldoa</i>   | Fructose-bisphosphate aldolase A (also known as Aldolase 1)                                 | AVR papilla                                                                            | Glycolytic gene; conversion of fructose-1,6-bisphosphate to glyceraldehyde 3-phosphate and dihydroxyacetone phosphate                                | 3,7,8       |
| <i>Alox12</i>  | Polyunsaturated fatty acid lipoxygenase ALOX12 (also known as Arachidonate 12-Lipoxygenase) | Cortical afferent arterioles and Glomerular distal afferent arterioles                 | Product of the arachidonate lipoxygenase; involved in vasotone regulation in response to angiotensin                                                 | 3,9-11      |
| <i>Apln</i>    | Apelin                                                                                      | Cortical angiogenic capillaries and Medullary angiogenic capillaries                   | Involved in angiogenesis                                                                                                                             | 3,12-14     |
| <i>Aplnr</i>   | Apelin Receptor                                                                             | Cortical angiogenic capillaries and medullary angiogenic capillaries                   | Involved in angiogenesis                                                                                                                             | 1,12,15     |
| <i>Apoe</i>    | Apolipoprotein E                                                                            | Cortical peritubular capillaries type 1                                                | Involved in lipid metabolism; internalization of lipoproteins or lipid complexes from the plasma to the cells by interacting with specific receptors | 3,16        |
| <i>Aqp1</i>    | Aquaporin 1                                                                                 | DVR                                                                                    | Passive transport of water along an osmotic gradient; involved in urine concentration                                                                | 1,3,17-20   |
| <i>Bmp4</i>    | Bone morphogenetic protein 4                                                                | Large arteries, cortical afferent arterioles and glomerular distal afferent arterioles | Secreted ligand of TGF- $\beta$ ; involved in elastic fiber assembly                                                                                 | 1,3,21      |
| <i>Calca</i>   | Calcitonin gene-related peptide 1                                                           | Cortical efferent arterioles and glomerular distal efferent arterioles                 | Involved in vasotone regulation; potent renal vasodilator                                                                                            | 3,22        |
| <i>Car2</i>    | Carbonic anhydrase 2                                                                        | AVR papilla                                                                            | Reversible conversion of carbon dioxide and water into carbonic acid; involved in urine concentration by interacting with AQP1                       | 3,23        |
| <i>Cd36</i>    | Platelet glycoprotein 4 (Fatty acid translocase)                                            | mRECs; medullary capillaries                                                           | Uptake of long-chain fatty acids from the circulation; renal deficiency linked to a higher risk for spontaneous hypertension                         | 3,24-26     |

|               |                                                                                        |                                                                                             |                                                                                                                 |              |
|---------------|----------------------------------------------------------------------------------------|---------------------------------------------------------------------------------------------|-----------------------------------------------------------------------------------------------------------------|--------------|
| <i>Cd9</i>    | CD9 antigen (Tetraspanin-29)                                                           | Cortical veins and AVR papilla                                                              | Osmolarity-induced gene; also involved in immune cell adhesion and extravasation                                | 3,27,28      |
| <i>Cldn5</i>  | Claudin-5                                                                              | Large arteries, cortical afferent arterioles, glomerular distal afferent arterioles and DVR | Endothelial tight junction; expression restricted in arteries and absent in capillaries and veins in the kidney | 1,3,12,17,29 |
| <i>Col4a1</i> | Collagen alpha-1 (IV) chain                                                            | Cortical angiogenic capillaries and medullary angiogenic capillaries                        | Involved in angiogenesis                                                                                        | 3,12,13      |
| <i>Col4a2</i> | Collagen alpha-2 (IV) chain                                                            | Cortical angiogenic capillaries and medullary angiogenic capillaries                        | Involved in angiogenesis                                                                                        | 3,13         |
| <i>Crip1</i>  | Cysteine-rich protein 1                                                                | DVR papilla and AVR papilla                                                                 | Stress response factor; cytoprotective                                                                          | 3,30         |
| <i>Cryab</i>  | Alpha-crystallin B chain                                                               | Cortical efferent arterioles, glomerular distal efferent arterioles and AVR papilla         | Part of the small heat shock protein family; hyperosmolarity-induced gene regulated by NFAT5                    | 3,31,32      |
| <i>Cxcl12</i> | Stromal cell-derived factor 1 (also known as C-X-C motif chemokine 12)                 | DVR and cortical afferent arterioles                                                        | Ligand for Cxcr4 and Cxcr7; important in development of the renal vasculature                                   | 3,33,34      |
| <i>Cxcr4</i>  | C-X-C Chemokine Receptor type 4 (also known as stromal cell-derived factor 1 receptor) | Glomerular afferent arterioles and JGA                                                      | Chemokine receptor; expressed by ECs in contact with renin-positive cells at the JGA                            | 34           |
| <i>Cyp4b1</i> | Cytochrome P450 4B1                                                                    | gRECs                                                                                       | Monooxygenase                                                                                                   | 3            |
| <i>Edn1</i>   | Endothelin-1                                                                           | Large arteries, cortical afferent arterioles, glomerular distal afferent arterioles and DVR | Vasotone regulation; potent vasoconstrictor                                                                     | 3,12,35,36   |
| <i>Ehd3</i>   | EH domain-containing protein 3                                                         | Glomerular capillaries                                                                      | Regulation of endocytic recycling of VEGFR2                                                                     | 1,3,37,38    |
| <i>Eng</i>    | Endoglin                                                                               | Glomerular capillaries                                                                      | Associated with the TGF- $\beta$ -BMP signaling pathway; important in vascular development and disease          | 3,39,40      |
| <i>Eln</i>    | Elastin                                                                                | Large arteries                                                                              | Elastic fiber assembly                                                                                          | 1,3,12,41    |
| <i>Esm1</i>   | Endothelial cell-specific molecule 1                                                   | Cortical angiogenic capillaries and medullary angiogenic capillaries                        | Involved in angiogenesis                                                                                        | 3,12-14      |

|                |                                                                                  |                                                                                                                                                                                                                                                       |                                                                                                                              |              |
|----------------|----------------------------------------------------------------------------------|-------------------------------------------------------------------------------------------------------------------------------------------------------------------------------------------------------------------------------------------------------|------------------------------------------------------------------------------------------------------------------------------|--------------|
| <i>Fbln5</i>   | Fibulin-5                                                                        | Large arteries, cortical afferent arterioles, cortical efferent arterioles, glomerular distal afferent arterioles, glomerular afferent arterioles JGA, glomerular efferent arterioles JGA, glomerular distal efferent arterioles, DVR and DVR papilla | Elastic fiber assembly                                                                                                       | 1,3,12,42,43 |
| <i>Fgf1</i>    | Fibroblast growth factor 1                                                       | Glomerular capillaries                                                                                                                                                                                                                                | Growth factor; regulation of renal blood pressure                                                                            | 1,44         |
| <i>Flt1</i>    | Vascular endothelial growth factor receptor 1                                    | Cortical peritubular capillaries type 1, cortical interferon activated capillaries, cortical angiogenic capillaries, medullary capillaries, medullary interferon activated capillaries, and medullary angiogenic capillaries                          | VEGF receptor                                                                                                                | 3            |
| <i>Flt4</i>    | Vascular endothelial growth factor receptor 3                                    | Lymphatics                                                                                                                                                                                                                                            | VEGF receptor                                                                                                                | 45           |
| <i>Fscn1</i>   | Fascin                                                                           | Cortical angiogenic capillaries and medullary angiogenic capillaries                                                                                                                                                                                  | Involved in angiogenesis                                                                                                     | 3,13         |
| <i>Fxyd2</i>   | Na(+)/K(+) ATPase subunit gamma                                                  | AVR papilla                                                                                                                                                                                                                                           | Hyperosmolarity-induced gene; regulation of the Na <sup>+</sup> /K <sup>+</sup> ATPase activity                              | 3,31         |
| <i>Fxyd5</i>   | FXYP domain-containing ion transport regulator 5                                 | DVR papilla and AVR papilla                                                                                                                                                                                                                           | Hyperosmolarity-induced gene; regulation of Na <sup>+</sup> /K <sup>+</sup> ATPase activity                                  | 3,46         |
| <i>Fxyd6</i>   | FXYP domain-containing ion transport regulator 6                                 | AVR                                                                                                                                                                                                                                                   | Regulation of Na <sup>+</sup> /K <sup>+</sup> ATPase activity                                                                | 3            |
| <i>Gapdh</i>   | Glyceraldehyde-3-phosphate dehydrogenase                                         | AVR papilla                                                                                                                                                                                                                                           | Glycolytic gene; conversion of glyceraldehyde 3-phosphate to D-glycerate 1,3-bisphosphate                                    | 3,7,8        |
| <i>Gas6</i>    | Growth arrest-specific protein 6                                                 | Cortical veins, glomerular efferent arterioles JGA and AVR                                                                                                                                                                                            | Regulation of endothelial permeability                                                                                       | 3,47         |
| <i>Gata5</i>   | Transcription factor GATA 5                                                      | gRECs                                                                                                                                                                                                                                                 | Transcription factor; crucial for gREC identity                                                                              | 1,3,24       |
| <i>Gja4</i>    | Gap junction alpha-4 protein                                                     | Cortical afferent arterioles, glomerular distal afferent arterioles, DVR and DVR papilla                                                                                                                                                              | Connexin 37; present in ECs from afferent arterioles but not efferent arterioles                                             | 3,33,48      |
| <i>Gja5</i>    | Gap junction alpha-5 protein                                                     | Glomerular afferent arterioles JGA and large arteries                                                                                                                                                                                                 | Connexin 40; regulation of renin release to regulate communication between the endothelium and the granular cells in the JGA | 3,12,49-51   |
| <i>Gpihbp1</i> | Glycosylphosphatidylinositol-anchored high density lipoprotein-binding protein 1 | Cortical angiogenic capillaries and medullary angiogenic capillaries                                                                                                                                                                                  | Involved in angiogenesis                                                                                                     | 3,13         |

|               |                                                              |                                                                                                                        |                                                                                                                                 |         |
|---------------|--------------------------------------------------------------|------------------------------------------------------------------------------------------------------------------------|---------------------------------------------------------------------------------------------------------------------------------|---------|
| <i>Hipk2</i>  | Homeodomain-interacting protein kinase 2                     | Glomerular capillaries                                                                                                 | Transcription factor; regulation of TGF- $\beta$ -dependent angiogenesis during embryonic development                           | 3,52    |
| <i>Hpgd</i>   | 15-hydroxyprostaglandin dehydrogenase                        | DVR                                                                                                                    | Vasotone regulation; involved in prostaglandin metabolism                                                                       | 3,53    |
| <i>Ifi203</i> | Interferon-activable protein 203                             | Cortical interferon activated capillaries and medullary interferon activated capillaries                               | Interferon-stimulated gene                                                                                                      | 3,54    |
| <i>Ifi204</i> | Interferon-activable protein 204                             | Cortical interferon activated capillaries and medullary interferon activated capillaries                               | Interferon-stimulated gene                                                                                                      | 3,54    |
| <i>Ifit1</i>  | Interferon-induced protein with tetratricopeptide repeats 1  | Cortical interferon activated capillaries and medullary interferon activated capillaries                               | Interferon-stimulated gene                                                                                                      | 3,54    |
| <i>Ifit2</i>  | Interferon-induced protein with tetratricopeptide repeats 2  | Cortical interferon activated capillaries and medullary interferon activated capillaries                               | Interferon-stimulated gene                                                                                                      | 3,54    |
| <i>Ifit3</i>  | Interferon-induced protein with tetratricopeptide repeats 3  | Cortical interferon activated capillaries and medullary interferon activated capillaries                               | Interferon-stimulated gene                                                                                                      | 3,54    |
| <i>Ifit3b</i> | Interferon-induced protein with tetratricopeptide repeats 3B | Cortical interferon activated capillaries and medullary interferon activated capillaries                               | Interferon-stimulated gene                                                                                                      | 3,54    |
| <i>Igfbp3</i> | Insulin-like growth factor-binding protein 3                 | cRECs                                                                                                                  | Insulin growth factor binding protein                                                                                           | 3,55,56 |
| <i>Igfbp7</i> | Insulin-like growth factor-binding protein 7                 | mRECs                                                                                                                  | Insulin growth factor binding protein; urinary marker of renal injury and predictor of renal recovery after acute kidney injury | 3,57    |
| <i>Insr</i>   | Insulin receptor                                             | Cortical peritubular capillaries type 1, cortical interferon activated capillaries and cortical angiogenic capillaries | Insulin growth factor binding receptor                                                                                          | 3       |
| <i>Irf7</i>   | Interferon regulatory factor 7                               | Cortical interferon activated capillaries and medullary interferon activated capillaries                               | Interferon-stimulated gene                                                                                                      | 3,54    |
| <i>Isg15</i>  | Ubiquitin-like protein ISG15                                 | Cortical interferon activated capillaries and medullary interferon activated capillaries                               | Interferon-stimulated gene                                                                                                      | 3,54    |
| <i>Jag1</i>   | Jagged1                                                      | Large arteries                                                                                                         | Notch ligand; EC expression important for vascular smooth muscle cells in development                                           | 3,58    |
| <i>Jup</i>    | Junction plakoglobin                                         | Cortical postcapillary venules and medullary postcapillary venules                                                     | Regulation of endothelial permeability by interacting with VE-Cadherin                                                          | 3,59,60 |

|                |                                                                        |                                                                                                                                                                                                                                                                                                                      |                                                                                                                                                                         |            |
|----------------|------------------------------------------------------------------------|----------------------------------------------------------------------------------------------------------------------------------------------------------------------------------------------------------------------------------------------------------------------------------------------------------------------|-------------------------------------------------------------------------------------------------------------------------------------------------------------------------|------------|
| <i>Kcnn4</i>   | Intermediate conductance calcium-activated potassium channel protein 4 | Cortical afferent arterioles, glomerular distal afferent arterioles and large arteries                                                                                                                                                                                                                               | Potassium channel activated by intracellular calcium                                                                                                                    | 1          |
| <i>Kdr</i>     | Vascular endothelial growth factor receptor 2                          | Cortical peritubular capillaries type 1, cortical interferon activated capillaries, cortical angiogenic capillaries, glomerular capillaries, medullary capillaries, medullary interferon activated capillaries, medullary angiogenic capillaries, cortical postcapillary venules and medullary postcapillary venules | VEGF receptor                                                                                                                                                           | 3          |
| <i>Klf4</i>    | Kruppel-like factor 4                                                  | Cortical efferent arterioles and glomerular distal efferent arterioles                                                                                                                                                                                                                                               | Shear stress-induced gene; protective effect in acute kidney injury and regulation of proteinuria                                                                       | 3,61       |
| <i>Ldha</i>    | L-lactate dehydrogenase A chain                                        | AVR papilla                                                                                                                                                                                                                                                                                                          | Glycolytic gene; conversion of lactate to pyruvate                                                                                                                      | 3,7,8      |
| <i>Lpl</i>     | Lipoprotein lipase                                                     | Glomerular capillaries                                                                                                                                                                                                                                                                                               | Involved in lipid metabolism; extracellular enzyme on the luminal side of the vascular endothelial surface; degradation of circulating triglycerides in the bloodstream | 3,12,62,63 |
| <i>Ltbp4</i>   | Latent-transforming growth factor beta-binding protein 4               | Large arteries                                                                                                                                                                                                                                                                                                       | Elastic fiber assembly by interacting with fibulin-5                                                                                                                    | 1,3,64     |
| <i>Lyve1</i>   | Lymphatic vessel endothelial hyaluronan receptor 1                     | Lymphatics                                                                                                                                                                                                                                                                                                           | Hyaluronan receptor                                                                                                                                                     | 65         |
| <i>Mapt</i>    | Microtubule-associated protein tau                                     | Glomerular capillaries                                                                                                                                                                                                                                                                                               | Promotion of microtubule assembly and stability                                                                                                                         | 3,66       |
| <i>Mgp</i>     | Matrix Gla protein                                                     | Large arteries                                                                                                                                                                                                                                                                                                       | Suppression of vascular calcification likely by inhibiting BMP2 and BMP4 signaling                                                                                      | 3,12,67    |
| <i>Nostrin</i> | Nostrin (also known as nitric oxide synthase trafficker)               | Glomerular capillaries                                                                                                                                                                                                                                                                                               | Triggering of eNOS translocation from the plasma membrane to vesicle-like subcellular structures, attenuating nitric oxide production                                   | 24,68      |
| <i>Npr3</i>    | Atrial natriuretic peptide receptor 3                                  | cRECs                                                                                                                                                                                                                                                                                                                | Regulates blood volume and sodium excretion                                                                                                                             | 3,69,70    |
| <i>Nr2f2</i>   | COUP transcription factor 2                                            | Cortical veins; cortical postcapillary venules; medullary postcapillary venules; AVR and AVR papilla                                                                                                                                                                                                                 | Vein transcription factor                                                                                                                                               | 3,12,71    |
| <i>Nrgn</i>    | Neurogranin                                                            | DVR papilla and AVR papilla                                                                                                                                                                                                                                                                                          | Calmodulin-binding protein                                                                                                                                              | 3          |

|               |                                                                 |                                                                                                                                                                                                                             |                                                                                                                                 |         |
|---------------|-----------------------------------------------------------------|-----------------------------------------------------------------------------------------------------------------------------------------------------------------------------------------------------------------------------|---------------------------------------------------------------------------------------------------------------------------------|---------|
| <i>Nrp1</i>   | Neuropilin-1                                                    | Cortical peritubular capillaries type 1, cortical interferon activated capillaries, cortical angiogenic capillaries, medullary capillaries, medullary interferon activated capillaries and medullary angiogenic capillaries | VEGF receptor                                                                                                                   | 3       |
| <i>Pdpn</i>   | Podoplanin                                                      | Lymphatics                                                                                                                                                                                                                  | Mucin-type protein; the most reliable marker in humans for lymphatic ECs                                                        | 72-74   |
| <i>Pi16</i>   | Peptidase inhibitor 16                                          | gRECs                                                                                                                                                                                                                       | Shear stress-induced gene                                                                                                       | 3,12,75 |
| <i>Plat</i>   | Tissue-type plasminogen activator                               | gRECs                                                                                                                                                                                                                       | Involved in the breakdown of blood clots; conversion of plasminogen to plasmin, a fibrinolytic enzyme                           | 3,12    |
| <i>Plk2</i>   | Serine/threonine-protein kinase PLK2                            | Cortical angiogenic capillaries and medullary angiogenic capillaries                                                                                                                                                        | Involved in angiogenesis                                                                                                        | 3,76    |
| <i>Plpp3</i>  | Phospholipid phosphatase 3                                      | Medullary capillaries and cortical peritubular capillaries type 1                                                                                                                                                           | Involved in lipid metabolism; catalyses the dephosphorylation of several lipid substrates; crucial role in vascular development | 3,77    |
| <i>Plvap</i>  | Plasmalemma vesicle-associated protein                          | Cortical peritubular capillaries, cortical interferon activated capillaries, cortical angiogenic capillaries, AVR and AVR papilla                                                                                           | PV-1; present in fenestrated ECs with diaphragms                                                                                | 1,3,78  |
| <i>Prox1</i>  | Prospero homeobox protein 1                                     | Lymphatics                                                                                                                                                                                                                  | Transcription factor; required for development of the murine lymphatic system                                                   | 79      |
| <i>Ptprr</i>  | Receptor-type tyrosine-protein phosphatase R                    | Glomerular efferent arterioles JGA                                                                                                                                                                                          | Hyperosmolarity-responsive gene                                                                                                 | 3,31    |
| <i>S100a4</i> | Protein S100-A4 (also known as S100 calcium-binding protein A4) | DVR papilla                                                                                                                                                                                                                 | Hyperosmolarity responsive-gene; NFAT5 target gene                                                                              | 3,46    |
| <i>S100a6</i> | Protein S100-A6 (also known as S100 calcium-binding protein A6) | DVR papilla and AVR papilla                                                                                                                                                                                                 | Hyperosmolarity responsive-gene; NFAT5 target gene                                                                              | 3,46    |
| <i>S1pr1</i>  | Sphingosine-1-phosphate receptor 1                              | Large arteries, cortical afferent arterioles and glomerular distal afferent arterioles                                                                                                                                      | Vascular tone regulation by activating eNOS                                                                                     | 3,80    |
| <i>Scin</i>   | Adseverin (also known as Scinderin)                             | DVR                                                                                                                                                                                                                         | Formation of a multiprotein complex, presumably for AQP-2 trafficking                                                           | 3,81    |
| <i>Scn7a</i>  | Sodium channel protein type 7 subunit alpha                     | Glomerular capillaries                                                                                                                                                                                                      | Voltage-gated sodium channel protein; linked to hypertension                                                                    | 1,24,82 |

|                 |                                                         |                                                                                                                                                                                                                                                       |                                                                                                                                      |              |
|-----------------|---------------------------------------------------------|-------------------------------------------------------------------------------------------------------------------------------------------------------------------------------------------------------------------------------------------------------|--------------------------------------------------------------------------------------------------------------------------------------|--------------|
| <i>Sema3g</i>   | Semaphorin-3G                                           | Large arteries, cortical afferent arterioles and cortical efferent arterioles                                                                                                                                                                         | Control of endothelial and smooth muscle cell functions in an autocrine and paracrine manner; positive angiogenesis regulator        | 3,83         |
| <i>Sema5a</i>   | Semaphorin-5A                                           | Glomerular capillaries                                                                                                                                                                                                                                | Crucial in vascular development by promoting angiogenesis                                                                            | 1,24,84      |
| <i>Slc14a1</i>  | Urea transporter 1 (also known as UT-B)                 | DVR                                                                                                                                                                                                                                                   | Urea transporter; necessary for urine concentration                                                                                  | 1,3,17,85,86 |
| <i>Slc2a1</i>   | Solute carrier family 2 member 1 (also known as GLUT-1) | Cortical peritubular capillaries type 1, cortical interferon activated capillaries and cortical angiogenic capillaries                                                                                                                                | Glucose transporter; glucose reabsorption in the blood stream                                                                        | 1,87         |
| <i>Slc26a10</i> | Solute carrier family 26 member 10                      | Glomerular afferent arterioles JGA                                                                                                                                                                                                                    | Pseudogene                                                                                                                           | 3            |
| <i>Slc5a3</i>   | Sodium/myo-inositol cotransporter                       | DVR                                                                                                                                                                                                                                                   | Myoinositol transporter; maintenance of cell volume during hyperosmolarity; NFAT5 target gene                                        | 1,88         |
| <i>Slc6a6</i>   | Sodium- and chloride-dependent taurine transporter      | Cortical efferent arterioles and glomerular distal efferent arterioles                                                                                                                                                                                | Taurine transporter; maintenance of cell volume during hyperosmolarity                                                               | 1,3          |
| <i>Slc8a1</i>   | Sodium/calcium exchanger 1                              | Cortical afferent arterioles, glomerular distal afferent arterioles and large arteries                                                                                                                                                                | Na <sup>+</sup> /Ca <sup>2+</sup> exchanger                                                                                          | 1            |
| <i>Smad6</i>    | MAD homolog 6 (also known as SMAD family member 6)      | Glomerular capillaries                                                                                                                                                                                                                                | Associated with the TGF-β–BMP signalling pathway; overexpression might prevent excessive TGF-β signalling and glomerular dysfunction | 3,39         |
| <i>Smad7</i>    | MAD homolog 7 (also known as SMAD family member 7)      | Glomerular capillaries                                                                                                                                                                                                                                | Associated with the TGF-β–BMP signalling pathway; overexpression might prevent excessive TGF-β signalling and glomerular dysfunction | 3,39         |
| <i>Sox17</i>    | Transcription factor SOX-17                             | Large arteries, cortical afferent arterioles, cortical efferent arterioles, glomerular distal afferent arterioles, glomerular afferent arterioles JGA, glomerular efferent arterioles JGA, glomerular distal efferent arterioles, DVR and DVR papilla | Arterial transcription factor                                                                                                        | 1,3,12,89    |
| <i>Tbx3</i>     | T-box transcription factor TBX3                         | gRECs                                                                                                                                                                                                                                                 | Transcription factor; crucial for gREC identity                                                                                      | 1,3,24       |
| <i>Tek</i>      | Angiopoietin-1 receptor                                 | AVR                                                                                                                                                                                                                                                   | Angiopoietin-1 receptor; necessary for maintaining medullary vascular bundles and for urine concentration                            | 3,90         |
| <i>Thrsp</i>    | Thyroid hormone-inducible hepatic protein               | Cortical peritubular capillaries type 1                                                                                                                                                                                                               | Involved in lipid metabolism for the de novo synthesis of fatty acids                                                                | 3,91         |
| <i>Tnxb</i>     | Tenascin X                                              | Cortical postcapillary venules and medullary postcapillary venules                                                                                                                                                                                    | Extracellular matrix protein; binding of VEGFA and VEGFB                                                                             | 3,92         |



|                 |                                                                                          |                                                                      |                                                  |         |
|-----------------|------------------------------------------------------------------------------------------|----------------------------------------------------------------------|--------------------------------------------------|---------|
| <i>Trp53i11</i> | Tumor protein p53-inducible protein 11                                                   | Cortical angiogenic capillaries and medullary angiogenic capillaries | Involved in angiogenesis                         | 3,12,13 |
| <i>Tspan7</i>   | Tetraspanin-7                                                                            | gRECs                                                                | Present in stalk cells in angiogenesis           | 3,13    |
| <i>Vegfa</i>    | Vascular endothelial growth factor A                                                     | Glomerular capillaries                                               | Maintenance of vascular homeostasis in adults    | 1,93    |
| <i>Xiap</i>     | E3 ubiquitin-protein ligase XIAP (also known as X-linked inhibitor of apoptosis protein) | Glomerular capillaries                                               | Apoptosis inhibitor; upregulated by TGF- $\beta$ | 3,94    |

AVR, ascending vasa recta; cRECs, cortical renal endothelial cells; DVR, descending vasa recta; eNOS, endothelial nitric oxide synthase; gRECS, glomerular renal endothelial cells; JGA, juxtaglomerular apparatus; NFAT5, Nuclear Factor Of Activated T Cells 5 (also known as TonEBP); mRECS, medullary renal endothelial cells; PV-1, plasmalemmal vesicle associated protein-1; TGF- $\beta$ , transforming growth factor beta; VEGF, vascular endothelial growth factor.

## References

- 1 Barry, D. M. *et al.* Molecular determinants of nephron vascular specialization in the kidney. *Nat Commun* **10**, 5705, doi:10.1038/s41467-019-12872-5 (2019).
- 2 van Aabel, R. A., Smeets, P. H., Peters, J. G., Bindels, R. J. & Russel, F. G. The MRP4/ABCC4 gene encodes a novel apical organic anion transporter in human kidney proximal tubules: putative efflux pump for urinary cAMP and cGMP. *J Am Soc Nephrol* **13**, 595-603 (2002).
- 3 Dumas, S. J. *et al.* Single-Cell RNA Sequencing Reveals Renal Endothelium Heterogeneity and Metabolic Adaptation to Water Deprivation. *J Am Soc Nephrol* **31**, 118-138, doi:10.1681/ASN.2019080832 (2020).
- 4 Arendshorst, W. J., Chatziantoniou, C. & Daniels, F. H. Role of angiotensin in the renal vasoconstriction observed during the development of genetic hypertension. *Kidney Int Suppl* **30**, S92-96 (1990).
- 5 Fesus, G. *et al.* Adiponectin is a novel humoral vasodilator. *Cardiovasc Res* **75**, 719-727, doi:10.1016/j.cardiores.2007.05.025 (2007).
- 6 Neuhofer, W. & Beck, F. X. Cell survival in the hostile environment of the renal medulla. *Annu Rev Physiol* **67**, 531-555, doi:10.1146/annurev.physiol.67.031103.154456 (2005).
- 7 Chen, Y., Fry, B. C. & Layton, A. T. Modeling glucose metabolism and lactate production in the kidney. *Math Biosci* **289**, 116-129, doi:10.1016/j.mbs.2017.04.008 (2017).
- 8 Eelen, G., de Zeeuw, P., Simons, M. & Carmeliet, P. Endothelial cell metabolism in normal and diseased vasculature. *Circ Res* **116**, 1231-1244, doi:10.1161/CIRCRESAHA.116.302855 (2015).
- 9 Ma, Y. H., Harder, D. R., Clark, J. E. & Roman, R. J. Effects of 12-HETE on isolated dog renal arcuate arteries. *Am J Physiol* **261**, H451-456, doi:10.1152/ajpheart.1991.261.2.H451 (1991).

- 10 Yiu, S. S., Zhao, X., Inscho, E. W. & Imig, J. D. 12-Hydroxyeicosatetraenoic acid participates in angiotensin II afferent arteriolar vasoconstriction by activating L-type calcium channels. *J Lipid Res* **44**, 2391-2399, doi:10.1194/jlr.M300183-JLR200 (2003).
- 11 Dobrian, A. D. *et al.* Functional and pathological roles of the 12- and 15-lipoxygenases. *Prog Lipid Res* **50**, 115-131, doi:10.1016/j.plipres.2010.10.005 (2011).
- 12 Kalucka, J. *et al.* Single-Cell Transcriptome Atlas of Murine Endothelial Cells. *Cell*, doi:10.1016/j.cell.2020.01.015 (2020).
- 13 Zhao, Q. *et al.* Single-Cell Transcriptome Analyses Reveal Endothelial Cell Heterogeneity in Tumors and Changes following Antiangiogenic Treatment. *Cancer Res* **78**, 2370-2382, doi:10.1158/0008-5472.CAN-17-2728 (2018).
- 14 del Toro, R. *et al.* Identification and functional analysis of endothelial tip cell-enriched genes. *Blood* **116**, 4025-4033, doi:10.1182/blood-2010-02-270819 (2010).
- 15 Saint-Geniez, M., Masri, B., Malecaze, F., Knibiehler, B. & Audigier, Y. Expression of the murine msr/apj receptor and its ligand apelin is upregulated during formation of the retinal vessels. *Mech Dev* **110**, 183-186, doi:10.1016/s0925-4773(01)00558-5 (2002).
- 16 Huang, Y. & Mahley, R. W. Apolipoprotein E: structure and function in lipid metabolism, neurobiology, and Alzheimer's diseases. *Neurobiol Dis* **72 Pt A**, 3-12, doi:10.1016/j.nbd.2014.08.025 (2014).
- 17 Lake, B. B. *et al.* A single-nucleus RNA-sequencing pipeline to decipher the molecular anatomy and pathophysiology of human kidneys. *Nat Commun* **10**, 2832, doi:10.1038/s41467-019-10861-2 (2019).
- 18 Ma, T. *et al.* Severely impaired urinary concentrating ability in transgenic mice lacking aquaporin-1 water channels. *J Biol Chem* **273**, 4296-4299, doi:10.1074/jbc.273.8.4296 (1998).
- 19 Verkman, A. S. Aquaporins in endothelia. *Kidney Int* **69**, 1120-1123, doi:10.1038/sj.ki.5000226 (2006).
- 20 King, L. S., Choi, M., Fernandez, P. C., Cartron, J. P. & Agre, P. Defective urinary concentrating ability due to a complete deficiency of aquaporin-1. *N Engl J Med* **345**, 175-179, doi:10.1056/NEJM200107193450304 (2001).
- 21 Tojais, N. F. *et al.* Codependence of Bone Morphogenetic Protein Receptor 2 and Transforming Growth Factor-beta in Elastic Fiber Assembly and Its Perturbation in Pulmonary Arterial Hypertension. *Arterioscler Thromb Vasc Biol* **37**, 1559-1569, doi:10.1161/ATVBAHA.117.309696 (2017).
- 22 Reslerova, M. & Loutzenhiser, R. Renal microvascular actions of calcitonin gene-related peptide. *Am J Physiol* **274**, F1078-1085, doi:10.1152/ajprenal.1998.274.6.F1078 (1998).
- 23 Krishnan, D. *et al.* Deficiency of Carbonic Anhydrase II Results in a Urinary Concentrating Defect. *Front Physiol* **8**, 1108, doi:10.3389/fphys.2017.01108 (2017).
- 24 Brunskill, E. W. & Potter, S. S. Gene expression programs of mouse endothelial cells in kidney development and disease. *PLoS One* **5**, e12034, doi:10.1371/journal.pone.0012034 (2010).
- 25 Jay, A. G. & Hamilton, J. A. The enigmatic membrane fatty acid transporter CD36: New insights into fatty acid binding and their effects on uptake of oxidized LDL. *Prostaglandins Leukot Essent Fatty Acids* **138**, 64-70, doi:10.1016/j.plefa.2016.05.005 (2018).

- 26 Pravenec, M. *et al.* Identification of renal Cd36 as a determinant of blood pressure and risk for hypertension. *Nat Genet* **40**, 952-954, doi:10.1038/ng.164 (2008).
- 27 Sheikh-Hamad, D. *et al.* CD9 antigen mRNA is induced by hypertonicity in two renal epithelial cell lines. *Am J Physiol* **270**, C253-258, doi:10.1152/ajpcell.1996.270.1.C253 (1996).
- 28 Reyes, R., Cardenas, B., Machado-Pineda, Y. & Cabanas, C. Tetraspanin CD9: A Key Regulator of Cell Adhesion in the Immune System. *Front Immunol* **9**, 863, doi:10.3389/fimmu.2018.00863 (2018).
- 29 Morita, K., Sasaki, H., Furuse, M. & Tsukita, S. Endothelial claudin: claudin-5/TMVCF constitutes tight junction strands in endothelial cells. *J Cell Biol* **147**, 185-194, doi:10.1083/jcb.147.1.185 (1999).
- 30 Latonen, L., Jarvinen, P. M. & Laiho, M. Cytoskeleton-interacting LIM-domain protein CRP1 suppresses cell proliferation and protects from stress-induced cell death. *Exp Cell Res* **314**, 738-747, doi:10.1016/j.yexcr.2007.11.024 (2008).
- 31 Izumi, Y., Yang, W., Zhu, J., Burg, M. B. & Ferraris, J. D. RNA-Seq analysis of high NaCl-induced gene expression. *Physiol Genomics* **47**, 500-513, doi:10.1152/physiolgenomics.00057.2015 (2015).
- 32 Lee, S. D. *et al.* TonEBP stimulates multiple cellular pathways for adaptation to hypertonic stress: organic osmolyte-dependent and -independent pathways. *Am J Physiol Renal Physiol* **300**, F707-715, doi:10.1152/ajprenal.00227.2010 (2011).
- 33 Poulos, M., Redmond, D., Gutkin, M., Ramalingam, P. & Butler, J. M. Single-Cell Characterization of the HSC-Supportive Bone Marrow Vascular Microenvironment. *Blood* **132**, doi:10.1182/blood-2018-99-120339 (2018).
- 34 Takabatake, Y. *et al.* The CXCL12 (SDF-1)/CXCR4 axis is essential for the development of renal vasculature. *J Am Soc Nephrol* **20**, 1714-1723, doi:10.1681/ASN.2008060640 (2009).
- 35 La, M. & Reid, J. J. Endothelin-1 and the regulation of vascular tone. *Clin Exp Pharmacol Physiol* **22**, 315-323, doi:10.1111/j.1440-1681.1995.tb02008.x (1995).
- 36 Masaki, T. Possible role of endothelin in endothelial regulation of vascular tone. *Annu Rev Pharmacol Toxicol* **35**, 235-255, doi:10.1146/annurev.pa.35.040195.001315 (1995).
- 37 George, M. *et al.* Renal thrombotic microangiopathy in mice with combined deletion of endocytic recycling regulators EHD3 and EHD4. *PLoS One* **6**, e17838, doi:10.1371/journal.pone.0017838 (2011).
- 38 Stewart, B. J. *et al.* Spatiotemporal immune zonation of the human kidney. *Science* **365**, 1461-1466, doi:10.1126/science.aat5031 (2019).
- 39 Cai, J., Pardali, E., Sanchez-Duffhues, G. & ten Dijke, P. BMP signaling in vascular diseases. *FEBS Lett* **586**, 1993-2002, doi:10.1016/j.febslet.2012.04.030 (2012).
- 40 ten Dijke, P., Goumans, M. J. & Pardali, E. Endoglin in angiogenesis and vascular diseases. *Angiogenesis* **11**, 79-89, doi:10.1007/s10456-008-9101-9 (2008).
- 41 Wagenseil, J. E. & Mecham, R. P. Elastin in large artery stiffness and hypertension. *J Cardiovasc Transl Res* **5**, 264-273, doi:10.1007/s12265-012-9349-8 (2012).
- 42 Chapman, S. L. *et al.* Fibulin-2 and fibulin-5 cooperatively function to form the internal elastic lamina and protect from vascular injury. *Arterioscler Thromb Vasc Biol* **30**, 68-74, doi:10.1161/ATVBAHA.109.196725 (2010).
- 43 Zheng, Q. *et al.* Molecular analysis of fibulin-5 function during de novo synthesis of elastic fibers. *Mol Cell Biol* **27**, 1083-1095, doi:10.1128/MCB.01330-06 (2007).

- 44 Tomaszewski, M. *et al.* Renal Mechanisms of Association between Fibroblast Growth Factor 1 and Blood Pressure. *J Am Soc Nephrol* **26**, 3151-3160, doi:10.1681/ASN.2014121211 (2015).
- 45 Jeltsch, M. *et al.* Hyperplasia of lymphatic vessels in VEGF-C transgenic mice. *Science* **276**, 1423-1425, doi:10.1126/science.276.5317.1423 (1997).
- 46 Schulze Blasum, B. *et al.* The kidney-specific expression of genes can be modulated by the extracellular osmolality. *FASEB J* **30**, 3588-3597, doi:10.1096/fj.201600319R (2016).
- 47 Ni, J. *et al.* Gas6 Attenuates Sepsis-Induced Tight Junction Injury and Vascular Endothelial Hyperpermeability via the Axl/NF-kappaB Signaling Pathway. *Front Pharmacol* **10**, 662, doi:10.3389/fphar.2019.00662 (2019).
- 48 Zhang, J. & Hill, C. E. Differential connexin expression in preglomerular and postglomerular vasculature: accentuation during diabetes. *Kidney Int* **68**, 1171-1185, doi:10.1111/j.1523-1755.2005.00509.x (2005).
- 49 Just, A. *et al.* Connexin 40 mediates the tubuloglomerular feedback contribution to renal blood flow autoregulation. *J Am Soc Nephrol* **20**, 1577-1585, doi:10.1681/ASN.2008090943 (2009).
- 50 Sorensen, C. M. *et al.* Role of connexin40 in the autoregulatory response of the afferent arteriole. *Am J Physiol Renal Physiol* **303**, F855-863, doi:10.1152/ajprenal.00026.2012 (2012).
- 51 Haefliger, J. A. *et al.* Connexins 40 and 43 are differentially regulated within the kidneys of rats with renovascular hypertension. *Kidney Int* **60**, 190-201, doi:10.1046/j.1523-1755.2001.00786.x (2001).
- 52 Shang, Y. *et al.* Transcriptional corepressors HIPK1 and HIPK2 control angiogenesis via TGF-beta-TAK1-dependent mechanism. *PLoS Biol* **11**, e1001527, doi:10.1371/journal.pbio.1001527 (2013).
- 53 Silldorff, E. P., Yang, S. & Pallone, T. L. Prostaglandin E2 abrogates endothelin-induced vasoconstriction in renal outer medullary descending vasa recta of the rat. *J Clin Invest* **95**, 2734-2740, doi:10.1172/JCI117976 (1995).
- 54 Schneider, W. M., Chevillotte, M. D. & Rice, C. M. Interferon-stimulated genes: a complex web of host defenses. *Annu Rev Immunol* **32**, 513-545, doi:10.1146/annurev-immunol-032713-120231 (2014).
- 55 Pollak, M. The insulin and insulin-like growth factor receptor family in neoplasia: an update. *Nat Rev Cancer* **12**, 159-169, doi:10.1038/nrc3215 (2012).
- 56 Varma Shrivastav, S., Bhardwaj, A., Pathak, K. A. & Shrivastav, A. Insulin-Like Growth Factor Binding Protein-3 (IGFBP-3): Unraveling the Role in Mediating IGF-Independent Effects Within the Cell. *Front Cell Dev Biol* **8**, 286, doi:10.3389/fcell.2020.00286 (2020).
- 57 Aregger, F. *et al.* Identification of IGFBP-7 by urinary proteomics as a novel prognostic marker in early acute kidney injury. *Kidney Int* **85**, 909-919, doi:10.1038/ki.2013.363 (2014).
- 58 High, F. A. *et al.* Endothelial expression of the Notch ligand Jagged1 is required for vascular smooth muscle development. *Proc Natl Acad Sci U S A* **105**, 1955-1959, doi:10.1073/pnas.0709663105 (2008).
- 59 Nottebaum, A. F. *et al.* VE-PTP maintains the endothelial barrier via plakoglobin and becomes dissociated from VE-cadherin by leukocytes and by VEGF. *J Exp Med* **205**, 2929-2945, doi:10.1084/jem.20080406 (2008).
- 60 Dejana, E., Orsenigo, F. & Lampugnani, M. G. The role of adherens junctions and VE-cadherin in the control of vascular permeability. *J Cell Sci* **121**, 2115-2122, doi:10.1242/jcs.017897 (2008).

- 61 Yoshida, T., Yamashita, M., Iwai, M. & Hayashi, M. Endothelial Kruppel-Like Factor 4 Mediates the Protective Effect of Statins against Ischemic AKI. *J Am Soc Nephrol* **27**, 1379-1388, doi:10.1681/ASN.2015040460 (2016).
- 62 Herman-Edelstein, M., Scherzer, P., Tobar, A., Levi, M. & Gafter, U. Altered renal lipid metabolism and renal lipid accumulation in human diabetic nephropathy. *J Lipid Res* **55**, 561-572, doi:10.1194/jlr.P040501 (2014).
- 63 Kang, H. M. *et al.* Defective fatty acid oxidation in renal tubular epithelial cells has a key role in kidney fibrosis development. *Nat Med* **21**, 37-46, doi:10.1038/nm.3762 (2015).
- 64 Noda, K. *et al.* Latent TGF-beta binding protein 4 promotes elastic fiber assembly by interacting with fibulin-5. *Proc Natl Acad Sci U S A* **110**, 2852-2857, doi:10.1073/pnas.1215779110 (2013).
- 65 Banerji, S. *et al.* LYVE-1, a new homologue of the CD44 glycoprotein, is a lymph-specific receptor for hyaluronan. *J Cell Biol* **144**, 789-801, doi:10.1083/jcb.144.4.789 (1999).
- 66 Mietelska-Porowska, A., Wasik, U., Goras, M., Filipek, A. & Niewiadomska, G. Tau protein modifications and interactions: their role in function and dysfunction. *Int J Mol Sci* **15**, 4671-4713, doi:10.3390/ijms15034671 (2014).
- 67 Bjorklund, G. *et al.* The Role of Matrix Gla Protein (MGP) in Vascular Calcification. *Curr Med Chem* **27**, 1647-1660, doi:10.2174/0929867325666180716104159 (2020).
- 68 Zimmermann, K. *et al.* NOSTRIN: a protein modulating nitric oxide release and subcellular distribution of endothelial nitric oxide synthase. *Proc Natl Acad Sci U S A* **99**, 17167-17172, doi:10.1073/pnas.252345399 (2002).
- 69 Matsukawa, N. *et al.* The natriuretic peptide clearance receptor locally modulates the physiological effects of the natriuretic peptide system. *Proc Natl Acad Sci U S A* **96**, 7403-7408, doi:10.1073/pnas.96.13.7403 (1999).
- 70 Potter, L. R. Natriuretic peptide metabolism, clearance and degradation. *FEBS J* **278**, 1808-1817, doi:10.1111/j.1742-4658.2011.08082.x (2011).
- 71 Herzlinger, D. & Hurtado, R. Patterning the renal vascular bed. *Semin Cell Dev Biol* **36**, 50-56, doi:10.1016/j.semcdb.2014.08.002 (2014).
- 72 Russell, P. S., Hong, J., Windsor, J. A., Itkin, M. & Phillips, A. R. J. Renal Lymphatics: Anatomy, Physiology, and Clinical Implications. *Front Physiol* **10**, 251, doi:10.3389/fphys.2019.00251 (2019).
- 73 Seeger, H., Bonani, M. & Segerer, S. The role of lymphatics in renal inflammation. *Nephrol Dial Transplant* **27**, 2634-2641, doi:10.1093/ndt/gfs140 (2012).
- 74 Breiteneder-Geleff, S. *et al.* Podoplanin, novel 43-kd membrane protein of glomerular epithelial cells, is down-regulated in puromycin nephrosis. *Am J Pathol* **151**, 1141-1152 (1997).
- 75 Hazell, G. G. *et al.* PI16 is a shear stress and inflammation-regulated inhibitor of MMP2. *Sci Rep* **6**, 39553, doi:10.1038/srep39553 (2016).
- 76 Yang, H. *et al.* Polo-like kinase 2 regulates angiogenic sprouting and blood vessel development. *Dev Biol* **404**, 49-60, doi:10.1016/j.ydbio.2015.05.011 (2015).
- 77 Busnelli, M., Manzini, S., Parolini, C., Escalante-Alcalde, D. & Chiesa, G. Lipid phosphate phosphatase 3 in vascular pathophysiology. *Atherosclerosis* **271**, 156-165, doi:10.1016/j.atherosclerosis.2018.02.025 (2018).
- 78 Stan, R. V., Kubitza, M. & Palade, G. E. PV-1 is a component of the fenestral and stomatal diaphragms in fenestrated endothelia. *Proc Natl Acad Sci U S A* **96**, 13203-13207, doi:10.1073/pnas.96.23.13203 (1999).

- 79 Wigle, J. T. & Oliver, G. Prox1 function is required for the development of the murine lymphatic system. *Cell* **98**, 769-778, doi:10.1016/s0092-8674(00)81511-1 (1999).
- 80 Cantalupo, A. *et al.* S1PR1 (Sphingosine-1-Phosphate Receptor 1) Signaling Regulates Blood Flow and Pressure. *Hypertension* **70**, 426-434, doi:10.1161/HYPERTENSIONAHA.117.09088 (2017).
- 81 Noda, Y., Horikawa, S., Katayama, Y. & Sasaki, S. Identification of a multiprotein "motor" complex binding to water channel aquaporin-2. *Biochem Biophys Res Commun* **330**, 1041-1047, doi:10.1016/j.bbrc.2005.03.079 (2005).
- 82 Zhang, B. *et al.* The association between the polymorphisms in a sodium channel gene SCN7A and essential hypertension: a case-control study in the Northern Han Chinese. *Ann Hum Genet* **79**, 28-36, doi:10.1111/ahg.12085 (2015).
- 83 Kutschera, S. *et al.* Differential endothelial transcriptomics identifies semaphorin 3G as a vascular class 3 semaphorin. *Arterioscler Thromb Vasc Biol* **31**, 151-159, doi:10.1161/ATVBAHA.110.215871 (2011).
- 84 Sadanandam, A., Rosenbaugh, E. G., Singh, S., Varney, M. & Singh, R. K. Semaphorin 5A promotes angiogenesis by increasing endothelial cell proliferation, migration, and decreasing apoptosis. *Microvasc Res* **79**, 1-9, doi:10.1016/j.mvr.2009.10.005 (2010).
- 85 Yang, B., Bankir, L., Gillespie, A., Epstein, C. J. & Verkman, A. S. Urea-selective concentrating defect in transgenic mice lacking urea transporter UT-B. *J Biol Chem* **277**, 10633-10637, doi:10.1074/jbc.M200207200 (2002).
- 86 Yang, B. & Bankir, L. Urea and urine concentrating ability: new insights from studies in mice. *Am J Physiol Renal Physiol* **288**, F881-896, doi:10.1152/ajprenal.00367.2004 (2005).
- 87 Mather, A. & Pollock, C. Glucose handling by the kidney. *Kidney Int Suppl*, S1-6, doi:10.1038/ki.2010.509 (2011).
- 88 Yorek, M. A., Dunlap, J. A. & Lowe, W. L., Jr. Osmotic regulation of the Na<sup>+</sup>/myo-inositol cotransporter and postinduction normalization. *Kidney Int* **55**, 215-224, doi:10.1046/j.1523-1755.1999.00235.x (1999).
- 89 Corada, M. *et al.* Sox17 is indispensable for acquisition and maintenance of arterial identity. *Nat Commun* **4**, 2609, doi:10.1038/ncomms3609 (2013).
- 90 Kenig-Kozlovsky, Y. *et al.* Ascending Vasa Recta Are Angiopoietin/Tie2-Dependent Lymphatic-Like Vessels. *J Am Soc Nephrol* **29**, 1097-1107, doi:10.1681/ASN.2017090962 (2018).
- 91 Yao, D. W. *et al.* Thyroid hormone responsive (THRSP) promotes the synthesis of medium-chain fatty acids in goat mammary epithelial cells. *J Dairy Sci* **99**, 3124-3133, doi:10.3168/jds.2015-10632 (2016).
- 92 Ikuta, T., Ariga, H. & Matsumoto, K. I. Effect of tenascin-X together with vascular endothelial growth factor A on cell proliferation in cultured embryonic hearts. *Biol Pharm Bull* **24**, 1320-1323, doi:10.1248/bpb.24.1320 (2001).
- 93 Lee, S. *et al.* Autocrine VEGF signaling is required for vascular homeostasis. *Cell* **130**, 691-703, doi:10.1016/j.cell.2007.06.054 (2007).
- 94 Van Themsche, C., Chaudhry, P., Leblanc, V., Parent, S. & Asselin, E. XIAP gene expression and function is regulated by autocrine and paracrine TGF-beta signaling. *Mol Cancer* **9**, 216, doi:10.1186/1476-4598-9-216 (2010).
